1 **Dynactin has two antagonistic regulatory domains and exerts opposing effects on**

2 **dynein motility**

3 Takuya Kobayashi<sup>1</sup>, Takuya Miyashita<sup>1</sup>, Takashi Murayama<sup>2</sup>, Yoko Y. Toyoshima<sup>1\*</sup>

4

5 <sup>1</sup> Department of Life Sciences, Graduate School of Arts and Sciences, The University of

6 Tokyo, Meguro-ku, Tokyo, Japan

7 <sup>2</sup> Department of Pharmacology, Juntendo University School of Medicine, Bunkyo-ku,

8 Tokyo, Japan

9

10 \*Corresponding author

11 E-mail: [cyytoyo@mail.ecc.u-tokyo.ac.jp](mailto:cyytoyo@mail.ecc.u-tokyo.ac.jp) (Y.Y.T.)

12

13

14

15

16

17

18

## 19 **Abstract**

20           Dynactin is a dynein-regulating protein that increases the processivity of  
21 dynein movement on microtubules. Recent studies have shown that a tripartite complex  
22 of dynein–dynactin–Bicaudal D2 is essential for highly processive movement. To  
23 elucidate the regulation of dynein motility by dynactin, we focused on two isoforms (A  
24 and B) of dynactin 1 (DCTN1), the largest subunit of dynactin that contains both  
25 microtubule- and dynein-binding domains. The only difference between the primary  
26 structures of the two isoforms is that DCTN1B lacks the K-rich domain, a cluster of  
27 basic residues. We measured dynein motility by single molecule observation of  
28 recombinant dynein and dynactin. Whereas the tripartite complex containing DCTN1A  
29 exhibited highly processive movement, the complex containing DCTN1B dissociated  
30 from microtubules with no apparent processive movement. This inhibitory effect of  
31 DCTN1B was caused by reductions of the microtubule-binding affinities of both dynein  
32 and dynactin, which is attributed to the coiled-coil 1 domain of DCTN1. In DCTN1A, the  
33 K-rich domain antagonized these inhibitory effects. Therefore, dynactin has two  
34 antagonistic domains and promotes or suppresses dynein motility to accomplish correct  
35 localization and functions of dynein within a cell.

36

## 37 **Introduction**

38           Dynactin is a very large multi-subunit complex that links dynein with its cargo  
39 and is known as a cytoplasmic dynein modulator by binding dynein to specific vesicles  
40 or organelles [1–3]. Cytoplasmic dynein is a minus end-directed multi-subunit  
41 microtubule motor protein [4]. Dynactin is involved in many cellular functions,  
42 including vesicle transport [2,5], organelle positioning [6,7], spindle assembly [8] and  
43 microtubule plus end localization [9–11] with dynein. Dynactin abnormalities cause  
44 several diseases, including Perry syndrome [12,13] and amyotrophic lateral sclerosis  
45 [14,15]. Dynein–dynactin (DD) complexes are distributed broadly range in cells and  
46 their spatial distribution changes throughout the cell cycle [16]. Correct localization of  
47 the DD complex is important for maintenance of cellular functions. However, the  
48 regulatory mechanism of the DD complex in determining its cellular distribution has  
49 been poorly understood.

50           Previous studies have indicated that dynactin enhances microtubule binding of  
51 dynein and induces processive movement of dynein using beads coated with multiple  
52 dynein molecules [17,18]. More recently, it has been reported that the DD complex itself  
53 does not exhibit unidirectional and highly processive movements. However, the dynein–  
54 dynactin–Bicaudal D2 (BICD2) (DDB) complex has exhibited unidirectional and highly

55 processive movements in single molecule observations [19,20].

56 Dynactin itself is a very large multi-subunit complex including dynactin 1  
57 (DCTN1) [21], p50, actin-related protein 1 (Arp1) [22], and other eight kinds of subunits  
58 [1]. DCTN1, also known as p150<sup>Glued</sup>, forms a dimer and extrudes the Arp rod as the arm  
59 and shoulder, containing a microtubule-binding region (N-terminal region) [23],  
60 dynein-binding region [coiled-coil 1 (CC1) domain] [24], and Arp1-binding region  
61 (C-terminal region) [3]. The N-terminal region consists of a CapGly domain [25,26] and  
62 K-rich domain [27]. The CapGly domain exhibits equimolar binding to microtubules [28],  
63 and the K-rich domain is involved in supporting this interaction [28], which is similar to  
64 the K-loop of kinesin [29,30]. The N-terminal region of DCTN1 is different between  
65 spliced isoforms, DCTN1A (1A isoform) and DCTN1B (1B isoform). The 1A isoform  
66 contains both CapGly and K-rich domains, whereas the 1B isoform lacks the K-rich  
67 domain [27]. These isoforms are differentially expressed in tissues [27,31]. However, the  
68 roles of these isoforms have not been elucidated in DD and DDB complexes.

69 In this study, we used recombinant DCTN1 to isolate the dynein complex with  
70 one DCTN1 isoform and conducted single-molecule observations to quantify the  
71 microtubule-binding ratio of dynein and dynactin. Consequently, we demonstrate that  
72 the two DCTN1 isoforms (1A and 1B) exert different effects on dynein motility. The 1A

73 isoform induces unidirectional movement, whereas the 1B isoform reduces the  
74 microtubule-binding affinity to inhibit unidirectional movement. By comparing the  
75 properties of the two isoforms and several mutants, we show that both CapGly and  
76 K-rich domains are essential for microtubule binding of dynein to promote  
77 unidirectional movement. Furthermore, we found that the CC1 domain is responsible  
78 for reductions of the microtubule-binding affinities of both dynein and dynactin and  
79 that the K-rich domain antagonizes these effects. We conclude that DCTN1 has two  
80 antagonistic regulatory domains that interact intramolecularly with each other and  
81 then exerts opposing effects on dynein motility.

82

## 83 **Materials and Methods**

### 84 **Construction of expression vectors**

85 cDNAs encoding DCTN1 isoforms and BICD2 were amplified from HEK293  
86 cells by RT-PCR. The PCR primers used for cloning DCTN1 isoforms were as follows:  
87 5'-ATGGCACAGAGCAAGAGGCAC-3' and 5'-TTAGGAGATGAGGCGACTGTG-3' for DCTN1  
88 (NM\_004082), and 5'-ATGTCGGCGCCGTCGGAGGAG-3' and  
89 5'-CTACAGGCTCGGTGTGGCTGGCTTGG-3' for BICD2 (NM\_015250). Note that our  
90 cloned DCTN1 sample from HEK293 cells was 1B isoform which lacked 21 amino acids

91 of the K-rich domain ( $\Delta$ exon 5–7) as reported by Dixit et al [32]. cDNA for the 1A isoform

92 was constructed by inverse PCR using the following PCR primers:

93 5'-GCCCGAAAGACCACAACCTCGGCGACCCAAGCCCACGCGCCCAGCCAGTACT-3'

94 and

95 5'-TGTCGGTGCCTTCTTAGGCTTCAGTCCCCGCAGTTTGCTAGTCTTTGCAGT-3'.

96 For 1B $\Delta$ CC1 mutant construction, the CC1 domain-coding region was deleted using the

97 following PCR primers: 5'-CCACCTCCAGAGACCTTTGAC-3' and

98 5'-TGGGGAAGGAAGCGGGGGGAC-3'.

99 The PCR products were cloned into pcDNA5/FRT/TO (LifeTechnologies), a  
100 tetracycline-inducible mammalian expression vector. For protein purification, the  
101 streptavidin-binding peptide (SBP)-tag-inserted multifunctional green fluorescent  
102 protein (GFP)-tag [33] was fused to the N-terminus of DCTN1. The insertion of these  
103 tags or deletion of specific domains was achieved by inverse PCR.

104

## 105 **Generation of stable inducible HEK293 cell lines**

106 Flp-In T-REx HEK293 cells (Life Technologies, Carlsbad, CA) were maintained  
107 in Dulbecco's modified Eagle's medium (Nacalai, Tokyo, Japan) supplemented with 10%  
108 fetal bovine serum and 2 mM L-glutamine. Stable inducible cell lines were generated by

109 co-transfection of the pcDNA5/FRT/TO vector containing recombinant DCTN1 isoforms  
110 or their mutants with the pOG44 vector encoding Flp recombinase according to the  
111 manufacturer's instructions. The transfectants were screened by selection with 100  
112  $\mu\text{g/ml}$  hygromycin, followed by harvesting hygromycin-resistant colonies.

113

## 114 **Protein purification**

115 HEK293 cells expressing DCTN1 isoforms, dynein heavy chain, or BICD2 were  
116 cultured in 20 150-mm culture dishes, and then collected and rinsed twice with  
117 phosphate-buffered saline. Cell lysates were prepared by homogenizing the cells in  
118 buffer B (10 mM Pipes-NaOH, pH 7.0, 200 mM NaCl, 10% sucrose, and 1 mM  
119 dithiothreitol) containing 0.05% Triton X-100 and complete mini protease inhibitor  
120 cocktail (Roche, Basel, Swiss). After centrifugation and filtration, the lysates were  
121 applied to a StrepTrap HP column (GE healthcare, Amersham, UK) that had been  
122 equilibrated with buffer B. After washing with buffer A (10 mM Pipes-NaOH, pH 7.0,  
123 150 mM NaCl, and 1 mM dithiothreitol), bound proteins were eluted with buffer B  
124 containing 2.5 mM desthiobiotin. Purified DCTN1 isoforms and mutants were  
125 confirmed by sodium dodecyl sulfate-polyacrylamide gel electrophoresis (SDS-PAGE)  
126 (S1 Fig).

127           The CC1 fragment consisted of 214–547 a.a. of p150<sup>Glued</sup>. The 1BN-GCN4  
128 fragment consisted of 1–193 a.a. of the 1B isoform and the GCN4 sequence [34] to  
129 dimerize this fragment. These fragments were fused with GFP and a His-tag at the  
130 C-terminus. CC1 and 1BN-GCN4 fragments were expressed in pET and pCold  
131 expression systems, respectively. These fragments were then purified using profinity  
132 IMAC Ni-charged Resin (Bio-Rad, Hercules, CA).

133

## 134 **Single molecule observation**

135           Flow chambers were constructed with silanized glass, which were coated with a  
136 5% anti- $\beta$  tubulin antibody solution and then blocked with 10% Pluronic F-127 and  
137 casein. Taxol-stabilized microtubules were introduced into the flow chamber to obtain a  
138 constant density of microtubules on the glass surface in each experiment, followed by  
139 Alexa 647-labeled dynein and GFP-labeled dynactin in SM buffer (12 mM Pipes-KOH,  
140 pH 6.8, 25 mM KAc, 1 mM ATP, 2 mM DTT, 10% saturated casein, and an  
141 oxygen-scavenging system). Single molecule observations were performed at 25°C using  
142 a total internal reflection fluorescence (TIRF) microscope (IX71, Olympus, Tokyo,  
143 Japan) equipped with a 100 $\times$ /1.45 PlanApo objective lens (Olympus). Images were  
144 acquired with a back illumination EMCCD camera (iXon, DV887DCS-BV, Andor, UK) at



145 an exposure time of 100 ms.

146 Dynein and dynactin behaviors were analyzed by recording fluorescent spots  
147 that were visible along microtubules for more than 1 s. The numbers of dynein and  
148 dynactin molecules were counted per microtubule length of 10  $\mu\text{m}$  for 10 s under the  
149 condition of 1 nM dynein or dynactin molecules. The attachment rate was the number of  
150 newly detected molecules on a microtubule for 10 s. Spots of dynein that moved  
151 bidirectionally for more than 400 nm were classified as “diffusive”, those that moved  
152 bidirectionally for less than 400 nm were classified as “stationary”, and those that  
153 moved to the minus end by more than 400 nm were classified as “unidirectional”.

154

## 155 **Protein binding assay**

156 Dynein and dynactin were mixed in assay buffer (10 mM Pipes-NaOH, pH 7.0,  
157 75 mM NaCl, 45 mM imidazole, and 0.01% Tween 20), and then the mixture was  
158 incubated for 10 min at 25°C. TALON Dynabeads (Life Technologies, Carlsbad, CA)  
159 were added to the mixture, followed by incubation for 10 min at 25°C. The Dynabeads  
160 were collected by a magnet. Unbound protein was recovered and washed twice with  
161 assay buffer. The bound protein was eluted by elution buffer (10 mM Pipes-NaOH, pH  
162 7.0, 150 mM NaCl, and 300 mM imidazole). Unbound and bound fractions were

163 analyzed by SDS-PAGE.

164

## 165 **Results**

### 166 **Motility of the DDB complex containing 1A or 1B** 167 **isoforms**

168 Previous studies have indicated that the DDB complex exhibits highly  
169 processive and unidirectional movements [19,20]. However, the difference in DCTN1  
170 isoforms of dynactin remains unknown in the DDB complex. To investigate whether  
171 DCTN1 isoforms influence the highly processive movement of DDB complexes, we  
172 observed the behavior of DDB complexes with different DCTN1 isoforms (1A and 1B) by  
173 TIRF microscopy (Fig 1). To this end, each DCTN1 isoform was fused with a  
174 multifunctional GFP-tag at the N-terminus and expressed in HEK293 cells (Fig 1a).  
175 These DCTN1 isoforms were incorporated into the endogenous dynactin complex and  
176 successfully purified by affinity chromatography (S1 Fig).

177 We observed the behavior of Alexa647-labeled dynein on microtubules (Fig 1b)  
178 and classified it into three types, i.e., diffusive, stationary and unidirectional movement  
179 (Fig 1c). The number of dynein molecules exhibiting each type of movement was  
180 calculated based on our counting criteria (see Materials and Methods). In the absence of

181 dynactin (dynein + BICD2), the number of dynein molecules on microtubules was  $5.6 \pm$   
182 0.8. Dynein was either stationary (55%) or diffusive (45%) and no processive movement  
183 was observed (Fig 1b, 1c and S1 Table). Addition of the 1A isoform (DDB 1A) did not  
184 change the number of dynein molecules on microtubules ( $5.2 \pm 1.0$ ). However, a  
185 significant fraction of dynein (17%) moved unidirectionally with marked reduction in  
186 the diffusive fraction (12%) and an increase in the stationary fraction (71%) compared  
187 with the absence of dynactin. The unidirectional movement occurred with a mean  
188 velocity of  $229.7 \pm 182.3$  nm/s and a mean run length of  $4.2 \pm 3.5$   $\mu$ m (Fig 1d). The highly  
189 processive movement of the DDB complex with the 1A isoform is consistent with  
190 previous reports [19,20].

191

192 **Fig 1. Behaviors of DDB complexes with different DCTN1 isoforms.** (a) N-terminal  
193 regions of DCTN1 isoforms. Amino acid numbering is based on p150<sup>glued</sup>. (b)  
194 Kymographs of dynein movement on microtubules (MTs) in the presence of 1 nM Alexa  
195 647-labeled dynein, 2 nM 1A or 1B isoforms, and 20 nM BICD2. (c) Quantification of the  
196 behavior of dynein molecules on MTs. The quantification data are presented as  
197 segmented vertical bars: the number of diffusive (red), stationary (blue), or  
198 unidirectional (green) dynein molecules on MTs. Quantification of dynein molecules on

199 MTs in the presence of each dynactin isoform or mutant. The number of dynein  
200 molecules on MTs in a time window (10 s) was normalized to the microtubule length (10  
201  $\mu\text{m}$ ) under the condition of 1 nM Alexa 647-labeled dynein and 2 nM 1A or 1B isoforms.  
202 Mean  $\pm$  S.D.,  $n = 9$  windows.  $*P < 0.01$ , Student's  $t$ -test. (d) Histograms of the velocity  
203 and run length of unidirectional movement of the DDB complex (1A). Mean  $\pm$  S.D.,  $n =$   
204 168 particles (velocity) and  $n = 80$  particles (run length).

205

206 In contrast, addition of the 1B isoform (DDB 1B) resulted in a significantly  
207 lower number of dynein molecules on microtubules ( $2.1 \pm 0.7$ ,  $P < 0.01$ ) than without  
208 dynactin or with the 1A isoform. Most dynein was stationary (81%) and the remaining  
209 fraction was diffusive (19%). No unidirectional movement was observed (Figs 1b and 1c).  
210 These results suggest that the 1A isoform is essential for unidirectional processive  
211 movement of the DDB complex. Furthermore, the fact that addition of the 1B isoform  
212 reduced the number of dynein molecules on microtubules suggests that the 1B isoform  
213 may inhibit microtubule binding of dynein in the DDB complex.

214

215 **Role of the DCTN1 isoform in the behavior of DD**  
216 **complexes on microtubules**

217 To investigate the effect of DCTN1 isoforms on dynein motility in a more simple  
218 system, we observed the behavior of DD complexes on microtubules in the absence of  
219 BICD2 (Fig 2a). The number of dynein molecules on microtubules was  $7.1 \pm 1.7$   
220 molecules in the absence of dynactin (Fig 2b). Seventy-six percent of the observed  
221 dynein exhibited diffusive motion and 24% of dynein molecules were stationary (Fig 2b  
222 and S1 Table). The number of dynein molecules on microtubules was slightly decreased  
223 in the presence of the 1A isoform ( $5.6 \pm 1.0$  dynein molecules,  $P < 0.01$ ). The fraction of  
224 stationary dynein molecules was increased to 59%, and 27% of dynein molecules  
225 exhibited diffusive motion. Surprisingly, 14% of dynein molecules exhibited  
226 unidirectional processive movement (S1 Movie). The mean velocity and run length of  
227 the unidirectional movement were  $130.0 \pm 79.5$  nm/s and  $1.6 \pm 0.9$   $\mu$ m, respectively (Fig  
228 2c), which were lower than those of the DDB complex (see Fig 1d). Conversely, in the  
229 presence of the 1B isoform, the number of dynein molecules was drastically decreased to  
230  $0.6 \pm 0.5$  (Figs 2a and 2b). Whereas 79% of dynein in the presence of the 1A isoform did  
231 not dissociate from microtubules during the observation (30 sec) (Fig 2a), the duration  
232 of dynein molecules on microtubules was greatly reduced in the presence of the 1B  
233 isoform ( $\tau = 1.2$  s) compared with the 1A isoform (Fig 2d). These findings indicate that  
234 the 1A isoform is necessary and sufficient for the unidirectional movement, and that the

235 1B isoform inhibits the microtubule binding ability of dynein.

236

237 **Fig 2. Behaviors of DD complexes with different DCTN1 isoforms.** (a) Kymographs of

238 dynein movement on microtubules (MTs) in the presence of each dynactin isoform. (b)

239 The number of dynein molecules on MTs was the same as that in Fig. 1c under the

240 condition of 1 nM Alexa 647-labeled dynein and 2 nM of each dynactin isoform. Mean  $\pm$

241 S.D.,  $n = 18$  windows (dynein alone),  $n = 15$  windows in the presence of 1A or 1B

242 isoforms. The number of dynein molecules under each condition was altered

243 significantly compared with dynein alone ( $P < 0.01$ , Student's  $t$ -test). Quantification of

244 the behavior of dynein molecules on MTs is presented as segmented vertical bars: the

245 number of diffusive (red), stationary (blue), or unidirectional (green) dynein molecules

246 on MTs. The number of dynein molecules on MTs was the same as that in Fig 1b. Mean

247  $\pm$  S.D. (c) Histograms of the velocity and run length of unidirectional movement of

248 dynein molecules in the presence of the 1A isoform.  $n = 92$  particles. (d) Duration of

249 dynein interacting with MTs in the presence of 1B.  $n = 23$  particles (1B isoform).

250

## 251 **The CC1 domain inhibits dynein motility.**

252 The above results clearly demonstrated that the 1B isoform inhibits the

253 microtubule-binding ability of dynein in both the DDB complex (Fig 1) and DD complex  
254 (Fig 2). We hypothesized that the binding of dynactin with the 1B isoform to dynein  
255 affects its microtubule-binding ability. It is known that the CC1 domain of DCTN1 binds  
256 to the dynein intermediate chain [24], and the Arp1-rod interacts with the dynein tail  
257 [35]. Therefore, we investigated the effect of the CC1 domain on the microtubule  
258 binding ability of dynein.

259 We constructed the CC1 fragment and the 1B isoform lacking the CC1 domain  
260 (1B $\Delta$ CC1) (Fig 3a) and initially examined the binding ability of the CC1 domain to  
261 dynein by pull-down assays with the purified proteins (Figs 3b and 3c). The 1B isoform  
262 bound to dynein in a simple 1:1 binding ratio with a dissociation constant ( $k_d$ ) of 2.3 nM.  
263 The engineered CC1 fragment also exhibited a similar binding ability with a  
264 dissociation constant ( $k_d$ ) of 2.0 nM. Conversely, the 1B isoform lacking the CC1 domain  
265 (1B $\Delta$ CC1) did not specifically bind to dynein. These results indicate that the CC1  
266 domain is the primary dynein-binding site of dynactin.

267

268 **Fig 3. The CC1 fragment binds to dynein and inhibits microtubule binding of dynein.** (a)

269 Mutant of the 1B isoform and the CC1 fragment. Amino acid numbering is based on  
270 p150<sup>glued</sup>. (b) Interactions between dynein and dynactin determined by TALON

271 Dynabeads pull-down assays of purified proteins. The protein bands of dynein heavy  
272 chain (DHC) in SDS-PAGE gels were quantified by densitometry. (c) Binding ratio of  
273 dynein with the 1B isoform (○), CC1 fragment (●), and 1BΔCC1 mutant (▼). (d)  
274 Kymographs of dynein motility on microtubules (MTs) in the presence of the 1BΔCC1  
275 mutant or CC1 fragment. (e) Quantification of dynein molecules on MTs in the presence  
276 of the 1BΔCC1 mutant or CC1 fragment. The number of dynein molecules on MTs was  
277 the same as that in Fig 1b under the condition of 1 nM Alexa 647-labeled dynein and 2  
278 nM 1BΔCC1 mutant or CC1 fragment. Mean ± S.D.,  $n = 15$  windows. \* $P < 0.01$ ,  
279 Student's  $t$ -test. N.S., not significant.

280

281 We next examined the effect of the CC1 fragment and 1BΔCC1 mutant on the  
282 microtubule-binding ability of dynein (Fig 3d). The CC1 fragment greatly reduced the  
283 number of dynein molecules ( $0.3 \pm 0.4$ , Fig 3e) to a level similar to that with the 1B  
284 isoform ( $0.6 \pm 0.5$ , Fig 2b). In contrast, the number of dynein molecules in the presence  
285 of the 1BΔCC1 mutant did not significantly differ ( $5.9 \pm 1.6$ , Fig 3e) compared with  
286 dynein alone ( $7.1 \pm 1.7$ , Fig 2b). These results demonstrate that the CC1 domain binds  
287 to dynein and inhibits the microtubule-binding ability of dynein.

288



## 289 **Microtubule-binding affinities of DCTN1 isoforms**

290           The fact that the CC1 domain binds to dynein and inhibits its microtubule  
291 binding in the 1B isoform raises an important issue: why the 1A isoform does not inhibit  
292 the microtubule binding of dynein and enables unidirectional processive movement.  
293 Dynactin itself interacts with microtubules via the N-terminal region of DCTN1 that  
294 contains a CapGly domain [23,28]. Because the K-rich domain is reported to increase  
295 the microtubule-binding ability of the CapGly domain, we hypothesized that the  
296 microtubule-binding ability of each DCTN1 isoform might be different. To estimate the  
297 microtubule-binding abilities of DCTN1 isoforms, we observed the behavior of dynactin  
298 on microtubules by TIRF microscopy. The 1A isoform was frequently observed on  
299 microtubules (Fig 4b) and the number of dynactin molecules on microtubules was  $6.6 \pm$   
300  $1.3$  (Fig 4c). In contrast, the 1B isoform exhibited a 10-fold reduction in the number of  
301 dynactin molecules on microtubules ( $0.6 \pm 0.6$ ).

302           The 1A isoform exhibited highly diffusive movements with a diffusion  
303 coefficient of  $46.9 \times 10^2 \text{ nm}^2/\text{s}$  (Fig 4d and S2 Fig) and interacted with microtubules for  
304 an average of 2.0 s (Fig 4e). Conversely, the 1B isoform moved much less diffusively with  
305 a diffusion coefficient of  $2.0 \times 10^2 \text{ nm}^2/\text{s}$  (Fig 4d and S2 Fig) and the dwell time on  
306 microtubules was 0.8 s (Fig 4e). The attachment rates of 1A and 1B isoforms were  $5.5 \pm$

307 0.6 and  $1.2 \pm 0.4$ , respectively (Fig 4f). Because the dissociation constant is proportional  
308 to the product of the attachment rate and duration, the dissociation constants of 1A and  
309 1B isoforms were  $0.1 \times 10^2 \mu\text{m nM}$  and  $1.0 \times 10^2 \mu\text{m nM}$ , respectively. Thus, the  
310 microtubule-binding affinity of the 1A isoform was 10-fold more than that of the 1B  
311 isoform. The observed number of molecules on microtubules (see Fig 4c) was consistent  
312 with the microtubule-binding affinity, indicating that the number of molecules based on  
313 our criteria is a good measure of the microtubule-binding affinity.

314           These results suggest that the 1B isoform has much lower microtubule-binding  
315 ability than the 1A isoform. Thus, the K-rich domain represses the inhibitory effect of  
316 the CC1 domain on the microtubule-binding ability of the 1A isoform.

317

318 **Fig 4. Single molecule behavior of dynactin on microtubules.** (a) Mutant of the 1B  
319 isoform and the fragments of DCTN1. Amino acid numbering is based on p150<sup>glued</sup>. (b)  
320 Kymographs of dynactin including each isoform and mutant behavior on microtubules  
321 (MTs). (c) Quantification of each isoform and mutant on MTs. The number of dynactin  
322 molecules on MTs was the same as that in Fig 1b. Mean  $\pm$  S.D.,  $n = 9$  windows (1A  
323 isoform, 1BACC1 mutant, 1BN-GCN4 fragment and CC1 fragment) and  $n = 6$  windows  
324 (1B isoform). \* $P < 0.01$ , Student's  $t$ -test. (d) Time course of displacement of 1A (upper

325 panel) and 1B (lower panel) isoforms on MTs. The diffusion coefficients of 1A and 1B  
326 isoforms were  $55.4 \times 10^2$  and  $1.9 \times 10^2$  nm<sup>2</sup>/s, respectively. (e) Duration of 1A (upper  
327 panel) or 1B (lower panel) isoforms on MTs.  $n = 487$  particles (1A isoform) and  $n = 454$   
328 particles (1B isoform). (f) Attachment rates of 1A and 1B isoforms. The attachment rate  
329 was normalized to the microtubule length (10  $\mu$ m) and observation time (10 s) under the  
330 condition of 1 nM GFP-fused dynactin. Mean  $\pm$  S.D.,  $n = 30$  microtubules (1A isoform),  $n$   
331 = 28 microtubules (1B isoforms), \* $P < 0.01$ , Student's  $t$ -test.

332

333 To examine the effect of the CC1 domain on the microtubule-binding ability of  
334 dynactin, we deleted the CC1 domain from the 1B isoform (1B $\Delta$ CC1). Interestingly, the  
335 1B $\Delta$ CC1 mutant interacted with microtubules ( $8.0 \pm 1.8$ ), which was comparable to the  
336 1A isoform ( $6.6 \pm 1.3$ ). Similarly, the 1BN-GCN4 fragment, which was the dimerized  
337 N-terminal fragment of the 1B isoform induced by the GCN4 sequence, interacted with  
338 microtubules at a similar level ( $9.6 \pm 1.7$ , Fig 4c). The CC1 fragment itself did not  
339 interact with microtubules (Fig 4c). These results suggest that the N-terminal region is  
340 a unique site in the dynactin complex to interact with microtubules. The  
341 microtubule-binding ability of the CapGly domain is reduced by the CC1 domain and  
342 the K-rich domain antagonizes the inhibitory effect of the CC1 domain.

343

## 344 **Discussion**

345           In this study, we found that dynactin has two agonistic regulatory domains  
346 (CC1 and K-rich domains) and exerts opposing effects on dynein motility depending on  
347 the DCTN1 isoform. The function of dynactin to increase dynein processivity, which has  
348 already been shown in previous reports [19,20], is considered to be attributed to the 1A  
349 isoform. Other than neurons, most tissues express more of the 1B isoform than the 1A  
350 isoform [27,31]. It appears that both 1A and 1B isoforms of DCTN1 coexisted in the  
351 previous reports [36,37], and the observed highly processive movement was achieved by  
352 the fraction with the 1A isoform. While the effect of the 1A isoform has been observed in  
353 previous studies, the properties of the 1B isoform were not revealed. In this study, we  
354 used recombinant DCTN1 isoforms and each isoform was investigated separately.  
355 Recombinant DCTN1 was incorporated into the dynactin complex and affinity purified  
356 using the SBP-tag in the fused multifunctional GFP [33] (S1 Fig). This purification  
357 method made it possible to isolate the dynactin complex with one DCTN1 isoform or  
358 mutant to compare the functions of the isoforms in dynein motility. Moreover, we  
359 evaluated the number of dynein molecules on microtubules by quantitative analysis. As  
360 a result, we were able to determine the unbinding property of DD complexes. So far, the

361 unbinding property has not been assessed by single molecule analysis because it is an  
362 invisible phenomenon. Our strategies revealed new functions of several domains within  
363 DCTN1.

364           In the presence of the 1A isoform, we detected a decrease in the fraction of  
365 diffusive molecules of the DD complex, but an increase in that of stationary molecules  
366 compared with dynein alone (Fig 2b). The increase in stationary dynein might be due to  
367 the increase in microtubule-binding affinity, because the number of microtubule-binding  
368 sites in a DD complex is twice that in dynein alone. Alternatively, while diffusive motion  
369 does not appear to be involved in the unique binding of dynein to microtubules, dynactin  
370 might increase the unique binding of dynein, leading to the increase in stationary  
371 fractions. The DD complex with the 1A isoform generated unidirectional movement in a  
372 manner similar to that of multimolecular dyneins [38]. Because the DDB complex  
373 showed higher velocity and processivity (Fig 1d) than the DD complex (Fig 2c), BICD2  
374 appears to regulate the complex to achieve a stable state that is favorable for the  
375 unidirectional movement and then increases processivity.

376           Conversely, the 1B isoform reduced the microtubule-binding affinity of dynein  
377 in both DDB and DD complexes (Figs 1c and 2b). Thus, the 1B isoform has an inhibitory  
378 effect on dynein motility. Because the only difference between the two isoforms is that

379 the 1B isoform lacks the K-rich domain, this domain is important to support the  
380 microtubule-binding ability of the CapGly domain. Furthermore, the lack of the K-rich  
381 domain caused dissociation of the DDB complex (DDB 1B) (Fig 1c) and DD complex (Fig  
382 2b). Therefore, the K-rich domain represses the dissociation of DDB and DD complexes  
383 by the 1B isoform (Fig 5, right, blue dashed line).

384

385 **Fig 5. Relationships between regulatory domains.** Left: The CC1 domain inhibits the  
386 microtubule-binding ability of the CapGly domain within the same molecule, and this  
387 inhibition is repressed by the K-rich domain. Right: The effect on dynactin itself still  
388 remains. The CC1 domain, which is bound to dynein, inhibits the microtubule-binding  
389 ability of the DD complex, and this inhibition is repressed by the K-rich domain.

390

391 The inhibition of dynein motility could thus be executed by non-N-terminal  
392 regions. Therefore, we focused on the CC1 domain that contains the dynein-binding site.  
393 The CC1 fragment, CC1-GFP, reduced the microtubule-binding affinity of dynein (Fig  
394 3e), suggesting that the CC1 domain is a regulatory unit to inhibit dynein motility (Fig  
395 5, right, red dashed line). This result is supported by a previous study using dynein  
396 molecule-coated beads [39]. Based on previous studies, the CC1 fragment is known to be

397 a dynein inhibitor because the addition of excess CC1 fragments disrupts the DD  
398 complex by competitive inhibition with endogenous dynactin in cells [40,41]. Our  
399 finding of the inhibitory effect of CC1 on dynein motility *in vitro* suggests that the  
400 inhibition of dynein motility in a cell is not only caused by disruption of DD complex but  
401 also by the direct inhibitory effect of CC1.

402         The inhibitory mechanism of the microtubule-binding ability of dynein by the  
403 CC1 domain is unknown. The CC1 domain is reported to contain the primary  
404 dynein-binding site that binds to the dynein intermediate chain [24,42,43]. Because the  
405 dynein heavy chain is involved in microtubule binding [44], it is plausible that the CC1  
406 domain also interacts with the heavy chain. The CC1 domain might have a secondary  
407 binding site for dynein, which may influence the microtubule-binding site of dynein,  
408 such as the stalk [45] or strut [46].

409         We further found that the CC1 domain affected the microtubule-binding ability  
410 of dynactin itself. The number of 1B $\Delta$ CC1 mutant molecules on microtubules (8.0) was  
411 higher than that of the 1B isoform (0.6) (Fig 4c), and the microtubule-binding affinity of  
412 the 1B $\Delta$ CC1 mutant was similar to that of the 1BN-GCN4 fragment as the dimerized  
413 CapGly fragment (Fig 4c). Thus, the CC1 domain may inhibit the microtubule-binding  
414 ability of the CapGly domain (Fig 5, left, red solid line). The number of 1A isoform

415 molecules on microtubules, in contrast, was 6.6, which was much higher than that of  
416 the 1B isoform (0.6) (Fig 4c). As the 1A isoform has the K-rich domain, the K-rich  
417 domain represses the inhibitory effect of the CC1 domain (Fig 5, left, blue solid line).  
418 Furthermore, the repression by the K-rich domain of the 1A isoform might not be  
419 complete, because the binding durations of the 1A isoform (2.0 s) was still lower than  
420 that of the CapGly fragment (2.9 s) in a previous study [28]. Thus, DCTN1 has two  
421 regulatory domains, K-rich and CC1, which interact intramolecularly with each other  
422 and change the microtubule-binding affinity of dynactin.

423         Although the 1A isoform induced unidirectional movement of the DD complex,  
424 the number of dynein molecules on microtubules with the 1A isoform was slightly lower  
425 than that of dynein alone (Fig 2b). Moreover, we detected an increase in the fraction of  
426 stationary molecules of the DDB complex with the 1B isoform (Fig 1c). These results  
427 suggest that the properties of the two isoforms are not exclusive, and that dynactin  
428 possesses opposing properties and the distinctive function of each isoform is constituted  
429 by a predominated one of opposing properties of the regulatory domains in DCTN1 (Fig  
430 5, left).

431         In a cell, the DD complex localizes at microtubule plus ends [10,16,47] or  
432 vesicles [16]. A previous *in vitro* reconstitution study only found the dynein–dynactin–



433 EB1 complex at the microtubule plus end [48], and it is known that EB1 binds to the  
434 CapGly domain [49,50]. Our findings suggest that the CC1 domain of the 1B isoform  
435 prevents the dynein–dynactin–EB1 complex from minus end directed movement by  
436 dynein, and the complex was found only at the plus end by the aid of +TIPs. In vesicle  
437 transport, vesicles with both dynein and kinesin can exhibit plus end directional  
438 movement along microtubules [16], because the 1B isoform suppresses dynein motility.  
439 The inhibitory effect of the CC1 domain of the 1B isoform on the microtubule-binding  
440 ability of the DD complex is involved in the passive transportation toward the plus end  
441 direction. The promotion and suppression of dynein motility may be crucial for correct  
442 localization and functions of dynein within a cell.

443

444

445

## 446 **Acknowledgements**

447 We thank K. Saito for helpful discussions and K. Matsuda for technical assistance.

448

449

## 450 **References**

- 451 1. Schroer TA. Dynactin. *Annu Rev Cell Dev Biol* [Internet]. 2004;20:759–79. Available  
452 from:  
453 [http://www.ncbi.nlm.nih.gov/entrez/query.fcgi?cmd=Retrieve&db=PubMed&dopt=Cit](http://www.ncbi.nlm.nih.gov/entrez/query.fcgi?cmd=Retrieve&db=PubMed&dopt=Citation&list_uids=15473859)  
454 [ation&list\\_uids=15473859](http://www.ncbi.nlm.nih.gov/entrez/query.fcgi?cmd=Retrieve&db=PubMed&dopt=Citation&list_uids=15473859)
- 455 2. Kwinter DM, Lo K, Mafi P, Silverman M a. Dynactin regulates bidirectional  
456 transport of dense-core vesicles in the axon and dendrites of cultured hippocampal  
457 neurons. *Neuroscience* [Internet]. 2009;162(4):1001–10. Available from:  
458 <http://dx.doi.org/10.1016/j.neuroscience.2009.05.038>
- 459 3. Kumar S, Zhou Y, Plamann M. Dynactin-membrane interaction is regulated by the  
460 C-terminal domains of p150(Glued). *EMBO Rep* [Internet]. 2001;2(10):939–44.  
461 Available from: <http://www.ncbi.nlm.nih.gov/pubmed/11571270>
- 462 4. Kardon JR, Vale RD. Regulators of the cytoplasmic dynein motor. *Nat Rev Mol Cell*  
463 *Biol* [Internet]. 2009;10(12):854–65. Available from:  
464 <http://dx.doi.org/10.1038/nrm2804>
- 465 5. Muresan V, Stankewich MC, Steffen W, Morrow JS, Holzbaur EL, Schnapp BJ.  
466 Dynactin-dependent, dynein-driven vesicle transport in the absence of membrane  
467 proteins: a role for spectrin and acidic phospholipids. *Mol Cell* [Internet].

- 468 2001;7(1):173–83. Available from: <http://www.ncbi.nlm.nih.gov/pubmed/11172722>
- 469 6. Deacon SW, Serpinskaya AS, Vaughan PS, Lopez Fanarraga M, Vernos I, Vaughan  
470 KT, et al. Dynactin is required for bidirectional organelle transport. *J Cell Biol*  
471 [Internet]. 2003;160(3):297–301. Available from:  
472 [http://www.pubmedcentral.nih.gov/articlerender.fcgi?artid=2172679&tool=pmcentre](http://www.pubmedcentral.nih.gov/articlerender.fcgi?artid=2172679&tool=pmcentrez&rendertype=abstract)  
473 [z&rendertype=abstract](http://www.pubmedcentral.nih.gov/articlerender.fcgi?artid=2172679&tool=pmcentrez&rendertype=abstract)
- 474 7. Allan V, V A. Organelle movement, Dynactin: portrait of a dynein regulator. *Curr*  
475 *Biol* [Internet]. 1994;4(11):1000–2. Available from:  
476 [http://www.sciencedirect.com/science?\\_ob=ArticleURL&\\_udi=B6VRT-4DGVHYY-5C](http://www.sciencedirect.com/science?_ob=ArticleURL&_udi=B6VRT-4DGVHYY-5C&_user=655616&_coverDate=11/30/1994&_rdoc=1&_fmt=high&_orig=search&_sort=d&_docanchor=&view=c&_acct=C000035458&_version=1&_urlVersion=0&_userid=655616&md5=e019aaad15101d9c8b7ee431370)  
477 [&\\_user=655616&\\_coverDate=11/30/1994&\\_rdoc=1&\\_fmt=high&\\_orig=search&\\_sort](http://www.sciencedirect.com/science?_ob=ArticleURL&_udi=B6VRT-4DGVHYY-5C&_user=655616&_coverDate=11/30/1994&_rdoc=1&_fmt=high&_orig=search&_sort=d&_docanchor=&view=c&_acct=C000035458&_version=1&_urlVersion=0&_userid=655616&md5=e019aaad15101d9c8b7ee431370)  
478 [=d&\\_docanchor=&view=c&\\_acct=C000035458&\\_version=1&\\_urlVersion=0&\\_userid](http://www.sciencedirect.com/science?_ob=ArticleURL&_udi=B6VRT-4DGVHYY-5C&_user=655616&_coverDate=11/30/1994&_rdoc=1&_fmt=high&_orig=search&_sort=d&_docanchor=&view=c&_acct=C000035458&_version=1&_urlVersion=0&_userid=655616&md5=e019aaad15101d9c8b7ee431370)  
479 [=655616&md5=e019aaad15101d9c8b7ee431370](http://www.sciencedirect.com/science?_ob=ArticleURL&_udi=B6VRT-4DGVHYY-5C&_user=655616&_coverDate=11/30/1994&_rdoc=1&_fmt=high&_orig=search&_sort=d&_docanchor=&view=c&_acct=C000035458&_version=1&_urlVersion=0&_userid=655616&md5=e019aaad15101d9c8b7ee431370)
- 480 8. Siller KH, Doe CQ. Lis1/dynactin regulates metaphase spindle orientation in  
481 *Drosophila* neuroblasts. *Dev Biol*. 2008;319(1):1–9.
- 482 9. Ligon LA, Shelly SS, Tokito M, Holzbaur EL. The microtubule plus-end proteins EB1  
483 and dynactin have differential effects on microtubule polymerization. *Mol Biol Cell*  
484 [Internet]. 2003;14(4):1405–17. Available from:

- 485 [http://www.ncbi.nlm.nih.gov/entrez/query.fcgi?cmd=Retrieve&db=PubMed&dopt=Cit](http://www.ncbi.nlm.nih.gov/entrez/query.fcgi?cmd=Retrieve&db=PubMed&dopt=Citation&list_uids=12686597)  
486 [ation&list\\_uids=12686597](http://www.ncbi.nlm.nih.gov/entrez/query.fcgi?cmd=Retrieve&db=PubMed&dopt=Citation&list_uids=12686597)
- 487 10. Zhang J, Li S, Fischer R, Xiang X. Accumulation of cytoplasmic dynein and dynactin  
488 at microtubule plus ends in *Aspergillus nidulans* is kinesin dependent. *Mol Biol Cell*  
489 [Internet]. 2003;14(4):1479–88. Available from:  
490 [http://www.pubmedcentral.nih.gov/articlerender.fcgi?artid=153116&tool=pmcentrez](http://www.pubmedcentral.nih.gov/articlerender.fcgi?artid=153116&tool=pmcentrez&rendertype=abstract)  
491 [&rendertype=abstract](http://www.pubmedcentral.nih.gov/articlerender.fcgi?artid=153116&tool=pmcentrez&rendertype=abstract)
- 492 11. Watson P, Stephens DJ. Microtubule plus-end loading of p150(Glued) is mediated by  
493 EB1 and CLIP-170 but is not required for intracellular membrane traffic in  
494 mammalian cells. *J Cell Sci* [Internet]. 2006;119(Pt 13):2758–67. Available from:  
495 <http://www.pubmedcentral.nih.gov/articlerender.fcgi?artid=1630633&tool=pmcentre>  
496 [z&rendertype=abstract](http://www.pubmedcentral.nih.gov/articlerender.fcgi?artid=1630633&tool=pmcentre)
- 497 12. Farrer MJ, Hulihan MM, Kachergus JM, Dächsel JC, Stoessl AJ, Grantier LL, et al.  
498 *DCTN1* mutations in Perry syndrome. *Nat Genet* [Internet]. 2009;41(2):163–5.  
499 Available from:  
500 <http://www.pubmedcentral.nih.gov/articlerender.fcgi?artid=2813485&tool=pmcentre>  
501 [z&rendertype=abstract](http://www.pubmedcentral.nih.gov/articlerender.fcgi?artid=2813485&tool=pmcentre)

- 502 13. Newsway V, Fish M, Rohrer JD, Majounie E, Williams N, Hack M, et al. Perry  
503 syndrome due to the DCTN1 G71R mutation: a distinctive levodopa responsive  
504 disorder with behavioral syndrome, vertical gaze palsy, and respiratory failure. *Mov*  
505 *Disord* [Internet]. 2010;25(6):767–70. Available from:  
506 <http://www.ncbi.nlm.nih.gov/pubmed/20437543>
- 507 14. Münch C, Rosenbohm A, Sperfeld AD, Uttner I, Reske S, Krause BJ, et al.  
508 Heterozygous R1101K mutation of the DCTN1 gene in a family with ALS and FTD.  
509 *Ann Neurol*. 2005;58(5):777–80.
- 510 15. Holzbaur ELF. Axonal Transport and ALS. *Encycl Neurosci*. 2010;1181–7.
- 511 16. Kobayashi T, Murayama T. Cell cycle-dependent microtubule-based dynamic  
512 transport of cytoplasmic dynein in mammalian cells. *PLoS One* [Internet].  
513 2009;4(11):e7827. Available from:  
514 <papers://4c48fe13-7c69-4b65-a0fa-467dcdedc3f/Paper/p13984>
- 515 17. King SJ, Schroer T a. Dynactin increases the processivity of the cytoplasmic dynein  
516 motor. *Nat Cell Biol*. 2000;2(1):20–4.
- 517 18. Culver-Hanlon TL, Lex S a, Stephens AD, Quintyne NJ, King SJ. A  
518 microtubule-binding domain in dynactin increases dynein processivity by skating

- 519 along microtubules. *Nat Cell Biol* [Internet]. 2006;8(3):264–70. Available from:
- 520 <http://www.ncbi.nlm.nih.gov/pubmed/16474384>
- 521 19. McKenney RJ, Huynh W, Tanenbaum ME, Bhabha G, Vale RD. Activation of
- 522 cytoplasmic dynein motility by dynactin-cargo adapter complexes. *Science* (80· )
- 523 [Internet]. 2014;345(6194):337–41. Available from:
- 524 <http://www.sciencemag.org/content/345/6194/337.full>
- 525 20. Schlager M a, Hoang HT, Urnavicius L, Bullock SL, Carter AP. In vitro
- 526 reconstitution of a highly processive recombinant human dynein complex. *EMBO J*
- 527 [Internet]. 2014;33(17):1–14. Available from:
- 528 <http://www.ncbi.nlm.nih.gov/pubmed/24986880>
- 529 21. Tokito MK, Holzbaur EL. The genomic structure of *DCTN1*, a candidate gene for
- 530 limb-girdle muscular dystrophy (LGMD2B). *Biochim Biophys Acta* [Internet].
- 531 1998;1442(2–3):432–6. Available from: <http://www.ncbi.nlm.nih.gov/pubmed/9805007>
- 532 22. Holleran E a., Tokito MK, Karki S, Holzbaur ELF. Centractin (ARP1) associates with
- 533 spectrin revealing a potential mechanism to link dynactin to intracellular organelles.
- 534 *J Cell Biol*. 1996;135(6 ID):1815–29.
- 535 23. Waterman-Storer CM, Karki S, Holzbaur EL. The p150Glued component of the

- 536            dynactin complex binds to both microtubules and the actin-related protein centractin  
537            (Arp-1). Proc Natl Acad Sci U S A. 1995;92(5):1634–8.
- 538    24.    Siglin AE, Sun S, Moore JK, Tan S, Poenie M, Lear JD, et al. Dynein and dynactin  
539            leverage their bivalent character to form a high-affinity interaction. PLoS One  
540            [Internet]. 2013;8(4):e59453. Available from:  
541            [http://www.pubmedcentral.nih.gov/articlerender.fcgi?artid=3618186&tool=pmcentre](http://www.pubmedcentral.nih.gov/articlerender.fcgi?artid=3618186&tool=pmcentrez&rendertype=abstract)  
542            [z&rendertype=abstract](http://www.pubmedcentral.nih.gov/articlerender.fcgi?artid=3618186&tool=pmcentrez&rendertype=abstract)
- 543    25.    Weisbrich A, Honnappa S, Jaussi R, Okhrimenko O, Frey D, Jelesarov I, et al.  
544            Structure-function relationship of CAP-Gly domains. Nat Struct Mol Biol [Internet].  
545            2007;14(10):959–67. Available from: <http://www.ncbi.nlm.nih.gov/pubmed/17828277>
- 546    26.    Li S, Finley J, Liu ZJ, Qiu SH, Chen H, Luan CH, et al. Crystal structure of the  
547            cytoskeleton-associated protein glycine-rich (CAP-Gly) domain. J Biol Chem.  
548            2002;277:48596–601.
- 549    27.    Zhapparova ON, Bryantseva S a, Dergunova L V, Raevskaya NM, Burakov A V,  
550            Bantysh OB, et al. Dynactin subunit p150Glued isoforms notable for differential  
551            interaction with microtubules. Traffic [Internet]. 2009;10(11):1635–46. Available  
552            from: <http://www.ncbi.nlm.nih.gov/pubmed/19778315>

- 553 28. Kobayashi T, Shiroguchi K, Edamatsu M, Toyoshima YY. Microtubule-binding  
554 properties of dynactin p150 expedient for dynein motility. *Biochem Biophys Res*  
555 *Commun* [Internet]. 2006;340(1):23–8. Available from:  
556 <http://www.ncbi.nlm.nih.gov/pubmed/16343429>
- 557 29. Okada Y, Hirokawa N. Mechanism of the single-headed processivity: diffusional  
558 anchoring between the K-loop of kinesin and the C terminus of tubulin. *Proc Natl*  
559 *Acad Sci U S A* [Internet]. 2000;97(2):640–5. Available from:  
560 [http://www.pubmedcentral.nih.gov/articlerender.fcgi?artid=15383&tool=pmcentrez&](http://www.pubmedcentral.nih.gov/articlerender.fcgi?artid=15383&tool=pmcentrez&rendertype=abstract)  
561 [rendertype=abstract](http://www.pubmedcentral.nih.gov/articlerender.fcgi?artid=15383&tool=pmcentrez&rendertype=abstract)
- 562 30. Rogers KR, Weiss S, Crevel I, Brophy PJ, Geeves M, Cross R. KIF1D is a fast  
563 non-processive kinesin that demonstrates novel K-loop-dependent mechanochemistry.  
564 *EMBO J* [Internet]. 2001;20(18):5101–13. Available from:  
565 <http://emboj.embopress.org/content/20/18/5101.abstract>
- 566 31. Lazarus JE, Moughamian AJ, Tokito MK, Holzbaur ELF. Dynactin Subunit  
567 p150(Glued) Is a Neuron-Specific Anti-Catastrophe Factor. *PLoS Biol* [Internet].  
568 2013;11(7):e1001611. Available from:  
569 <http://www.pubmedcentral.nih.gov/articlerender.fcgi?artid=3712912&tool=pmcentre>  
570 [z&rendertype=abstract](http://www.pubmedcentral.nih.gov/articlerender.fcgi?artid=3712912&tool=pmcentre&rendertype=abstract)



- 571 32. Dixit R, Levy JR, Tokito M, Ligon LA, Holzbaur EL. Regulation of dynactin through  
572 the differential expression of p150Glued isoforms. *J Biol Chem* [Internet].  
573 2008;283(48):33611–9. Available from:  
574 [http://www.ncbi.nlm.nih.gov/entrez/query.fcgi?cmd=Retrieve&db=PubMed&dopt=Cit](http://www.ncbi.nlm.nih.gov/entrez/query.fcgi?cmd=Retrieve&db=PubMed&dopt=Citation&list_uids=18812314)  
575 [ation&list\\_uids=18812314](http://www.ncbi.nlm.nih.gov/entrez/query.fcgi?cmd=Retrieve&db=PubMed&dopt=Citation&list_uids=18812314)
- 576 33. Kobayashi T, Morone N, Kashiyama T, Oyamada H, Kurebayashi N, Murayama T.  
577 Engineering a novel multifunctional green fluorescent protein tag for a wide variety  
578 of protein research. *PLoS One* [Internet]. 2008;3(12):e3822. Available from:  
579 <http://journals.plos.org/plosone/article?id=10.1371/journal.pone.0003822>
- 580 34. Pensato S, Renda M, Leccia F, Saviano M, D'Andrea LD, Pedone C, et al. PNA zipper  
581 as a dimerization tool: Development of a bZip Mimic. *Biopolymers*. 2010;93(5):434–  
582 41.
- 583 35. Urnavicius L, Zhang K, Diamant AG, Motz C, Schlager MA, Yu M, et al. The  
584 structure of the dynactin complex and its interaction with dynein. *Science* (80- )  
585 [Internet]. 2015;347(6229):1441–6. Available from:  
586 <http://www.sciencemag.org/cgi/doi/10.1126/science.aaa4080>
- 587 36. Ross JL, Wallace K, Shuman H, Goldman YE, Holzbaur ELF. Processive

- 588           bidirectional motion of dynein–dynactin complexes in vitro. *Nat Cell Biol* [Internet].  
589           2006;8(6):562–70. Available from: <http://www.nature.com/doi/finder/10.1038/ncb1421>
- 590    37.    Kardon JR, Reck-Peterson SL, Vale RD. Regulation of the processivity and  
591           intracellular localization of *Saccharomyces cerevisiae* dynein by dynactin. *Proc Natl*  
592           *Acad Sci U S A* [Internet]. 2009;106(14):5669–74. Available from:  
593           [http://www.pubmedcentral.nih.gov/articlerender.fcgi?artid=2657088&tool=pmcentre](http://www.pubmedcentral.nih.gov/articlerender.fcgi?artid=2657088&tool=pmcentrez&rendertype=abstract)  
594           [z&rendertype=abstract](http://www.pubmedcentral.nih.gov/articlerender.fcgi?artid=2657088&tool=pmcentrez&rendertype=abstract)
- 595    38.    Torisawa T, Ichikawa M, Furuta A, Saito K, Oiwa K, Kojima H, et al. Autoinhibition  
596           and cooperative activation mechanisms of cytoplasmic dynein. *Nat Cell Biol*  
597           [Internet]. 2014;16(11):1118–24. Available from:  
598           <http://www.nature.com/doi/finder/10.1038/ncb3048>
- 599    39.    Tripathy SK, Weil SJ, Chen C, Anand P, Vallee RB, Gross SP. Autoregulatory  
600           mechanism for dynactin control of processive and diffusive dynein transport. *Nat Cell*  
601           *Biol* [Internet]. 2014;16(12):1192–201. Available from:  
602           <http://www.nature.com/doi/finder/10.1038/ncb3063>
- 603    40.    Shrum CK, Defrancisco D, Meffert MK. Stimulated nuclear translocation of  
604           NF- $\kappa$ B and shuttling differentially depend on dynein and the dynactin complex.

- 605 Proc Natl Acad Sci U S A [Internet]. 2009;106(8):2647–52. Available from:
- 606 [http://www.pubmedcentral.nih.gov/articlerender.fcgi?artid=2650318&tool=pmcentre](http://www.pubmedcentral.nih.gov/articlerender.fcgi?artid=2650318&tool=pmcentrez&rendertype=abstract)
- 607 [z&rendertype=abstract](http://www.pubmedcentral.nih.gov/articlerender.fcgi?artid=2650318&tool=pmcentrez&rendertype=abstract)
- 608 41. Brocard CB, Boucher KK, Jedeszko C, Kim PK, Walton P a. Requirement for
- 609 microtubules and dynein motors in the earliest stages of peroxisome biogenesis.
- 610 Traffic [Internet]. 2005;6(5):386–95. Available from:
- 611 <http://www.ncbi.nlm.nih.gov/pubmed/15813749>
- 612 42. Karki S, Holzbaur EL. Affinity chromatography demonstrates a direct binding
- 613 between cytoplasmic dynein and the dynactin complex. J Biol Chem [Internet].
- 614 1995;270(48):28806–11. Available from:
- 615 <http://www.ncbi.nlm.nih.gov/pubmed/7499404>
- 616 43. Vaughan KT, Vallee RB. Cytoplasmic dynein binds dynactin through a direct
- 617 interaction between the intermediate chains and p150Glued. J Cell Biol [Internet].
- 618 1995;131(6 Pt 1):1507–16. Available from:
- 619 [http://www.pubmedcentral.nih.gov/articlerender.fcgi?artid=2120689&tool=pmcentre](http://www.pubmedcentral.nih.gov/articlerender.fcgi?artid=2120689&tool=pmcentrez&rendertype=abstract)
- 620 [z&rendertype=abstract](http://www.pubmedcentral.nih.gov/articlerender.fcgi?artid=2120689&tool=pmcentrez&rendertype=abstract)
- 621 44. Gee M a, Heuser JE, Vallee RB. An extended microtubule-binding structure within

- 622 the dynein motor domain. *Nature*. 1997;390(6660):636–9.
- 623 45. Gibbons IR, Garbarino JE, Tan CE, Reck-Peterson SL, Vale RD, Carter AP. The  
624 affinity of the dynein microtubule-binding domain is modulated by the conformation  
625 of its coiled-coil stalk. *J Biol Chem* [Internet]. 2005;280(25):23960–5. Available from:  
626 [http://www.pubmedcentral.nih.gov/articlerender.fcgi?artid=1464088&tool=pmcentre  
627 z&rendertype=abstract](http://www.pubmedcentral.nih.gov/articlerender.fcgi?artid=1464088&tool=pmcentrez&rendertype=abstract)
- 628 46. Kon T, Sutoh K, Kurisu G. X-ray structure of a functional full-length dynein motor  
629 domain. *Nat Struct Mol Biol* [Internet]. 2011;18(6):638–42. Available from:  
630 <http://dx.doi.org/10.1038/nsmb.2074>
- 631 47. Hendricks AG, Lazarus JE, Perlson E, Gardner MK, Odde DJ, Goldman YE, et al.  
632 Dynein tethers and stabilizes dynamic microtubule plus ends. *Curr Biol*.  
633 2012;22:632–7.
- 634 48. Duellberg C, Trokter M, Jha R, Sen I, Steinmetz MO, Surrey T. Reconstitution of a  
635 hierarchical +TIP interaction network controlling microtubule end tracking of dynein.  
636 *Nat Cell Biol* [Internet]. 2014;16(8):804–11. Available from:  
637 <http://dx.doi.org/10.1038/ncb2999>
- 638 49. Yan S, Hou G, Schwieters CD, Ahmed S, Williams JC, Polenova T.

639 Three-dimensional structure of CAP-gly domain of mammalian dynactin determined  
640 by magic angle spinning NMR spectroscopy: Conformational plasticity and  
641 interactions with end-binding protein EB1. *J Mol Biol* [Internet]. 2013;425(22):4249–  
642 66. Available from: <http://dx.doi.org/10.1016/j.jmb.2013.04.027>

643 50. Askham JM, Vaughan KT, Goodson H V, Morrison EE. Evidence that an interaction  
644 between EB1 and p150(Glued) is required for the formation and maintenance of a  
645 radial microtubule array anchored at the centrosome. *Mol Biol Cell* [Internet].  
646 2002;13(10):3627–45. Available from:  
647 <http://www.molbiolcell.org/content/13/10/3627.short>∓[http://www.pubmedcentral.ni](http://www.pubmedcentral.nih.gov/articlerender.fcgi?artid=129971&tool=pmcentrez&rendertype=abstract)  
648 [h.gov/articlerender.fcgi?artid=129971&tool=pmcentrez&rendertype=abstract](http://www.pubmedcentral.nih.gov/articlerender.fcgi?artid=129971&tool=pmcentrez&rendertype=abstract)

649  
650

## 651 **Supporting information**

652 **S1 Fig. SDS-PAGE of purified dynactins.** Lane 1: marker; lane 2: 1A isoform; lane 3: 1B  
653 isoform; lane 3: 1BACC1 mutant.

654 **S2 Fig. Mean square displacement (MSD) plots.** MSD plots of 1A (●) and 1B (○) isoforms.

655 Mean ± S.D. The diffusion coefficient ( $D$ ) was calculated by the following formula: MSD

656 =  $2Dt$ .

657 **S1 Table. Quantification of dynein molecules behaviors on microtubules.**

658 **S1 Movie. The 1A isoform induces unidirectional movement of dynein.** Left panel: Alexa

659 647-labeled dynein; middle panel: GFP fused 1A isoform; right panel: merged movie.

660 The playback speed is 10-fold faster than the acquisition speed. Scale bar is 1 $\mu$ m.

# Fig 1

a

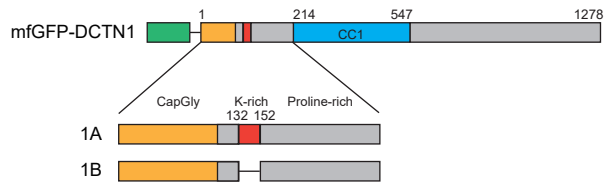

b

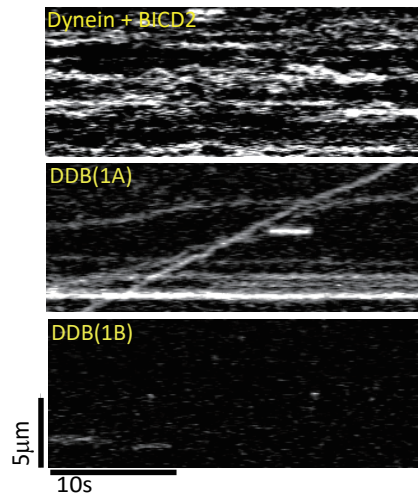

c

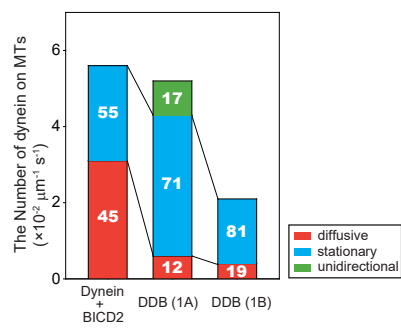

d

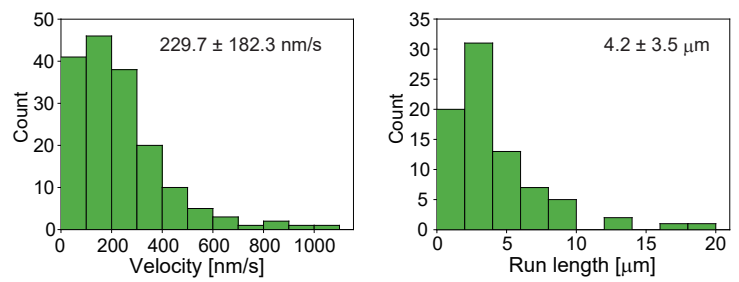

## Fig 2

**a**

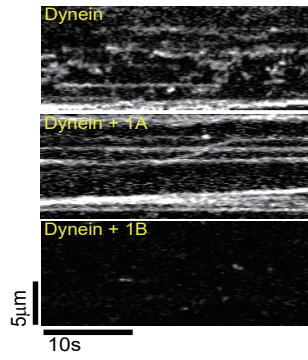

**b**

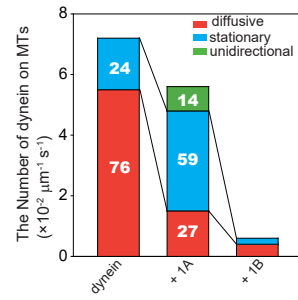

**c**

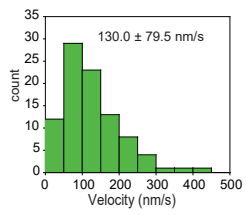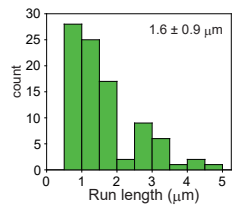

**d**

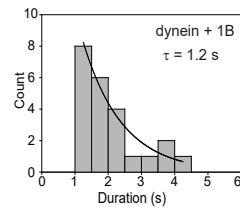



## Fig 3

**a**

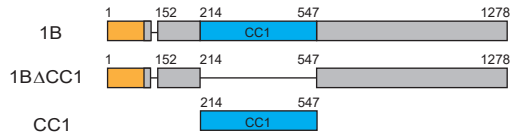

**b**

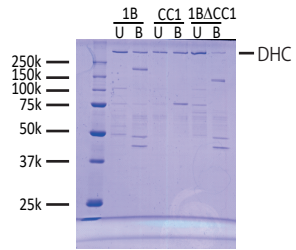

**c**

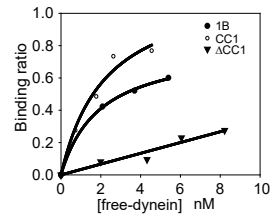

**d**

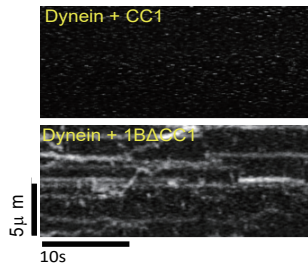

**e**

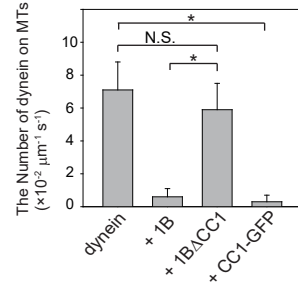

## Fig 4

**a**

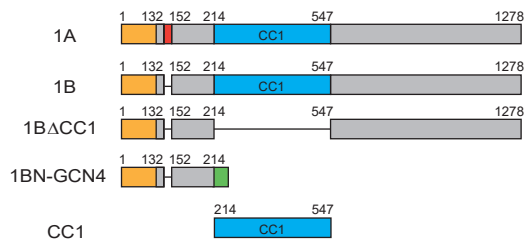

**b**

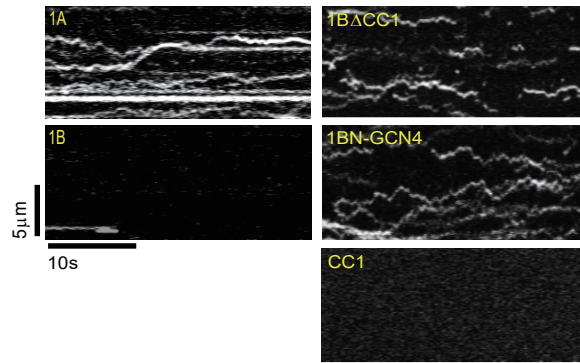

**c**

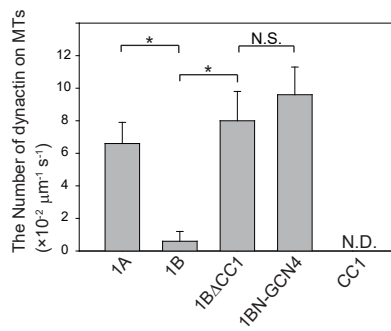

**d**

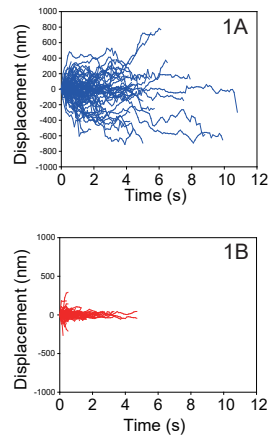

**e**

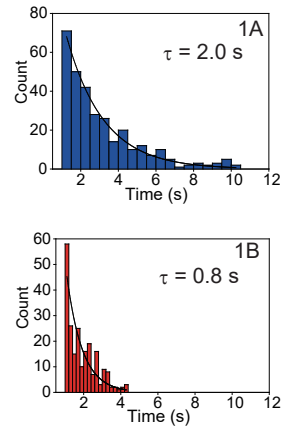

**f**

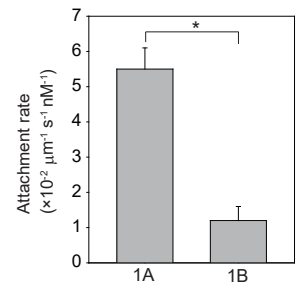

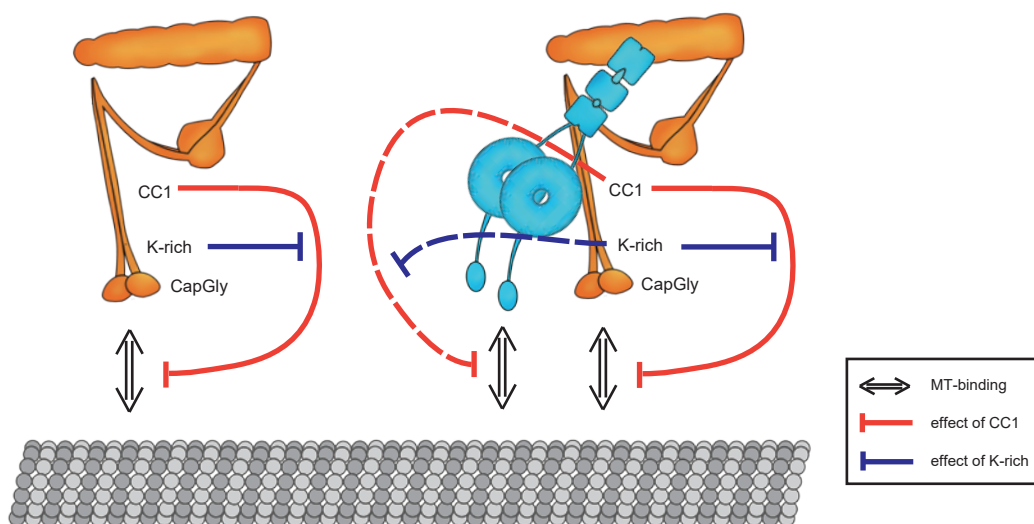

Source: https://www.biorxiv.org/content/10.1101/110775v1.full.pdf
